# Supplementary material for: Utilisation of Intermediate Care Units: A Systematic Review
Source: Hindawi journal article supplement (doi:10.1155/2017/8038460), 2017-01-01
Supplement: f1 [file 8038460.f1.pdf]

## Supplementary Material 1. Search terms

(Medium Care Unit\*[title/abstract] OR  
Medium Medical Care Unit\*[title/abstract] OR  
Intermediate Care Unit\*[title/abstract] OR  
Intermediate Medical Care Unit\*[title/abstract]  
OR  
Medical Intermediate Care Unit\*[title/abstract]  
OR  
High Care Unit\*[title/abstract] OR  
High Medical Care Unit\*[title/abstract] OR  
High Dependency Unit\*[title/abstract] OR  
High-Dependency Unit\*[title/abstract] OR  
Progressive care unit\*[title/abstract] OR  
Step up/down unit\*[title/abstract] OR  
Step-up unit\*[title/abstract] OR  
Step up unit\*[title/abstract] OR  
Step-down unit\*[title/abstract] OR  
Step down unit\*[title/abstract] OR  
Transitional care unit\*[title/abstract] OR

Medium Care Ward\*[title/abstract] OR  
Medium Medical Care Ward\*[title/abstract] OR  
Intermediate Care Ward\*[title/abstract] OR  
Intermediate Medical Care Ward\*[title/abstract]  
OR  
Medical Intermediate Care Ward\*[title/abstract]  
OR  
High Care Ward\*[title/abstract] OR  
High Medical Care Ward\*[title/abstract] OR  
High Dependency Ward\*[title/abstract] OR  
High-Dependency Ward\*[title/abstract] OR  
Progressive care Ward\*[title/abstract] OR  
Step up/down Ward\*[title/abstract] OR  
Step-up Ward\*[title/abstract] OR  
Step up Ward\*[title/abstract] OR  
Step-down Ward\*[title/abstract] OR  
Step down Ward\*[title/abstract] OR  
Transitional care Ward\*[title/abstract])

NOT (

Child\*[title/abstract] OR  
Paediatric\*[title/abstract] OR  
Infant\*[title/abstract] OR  
Neonate\*[title/abstract] OR  
Pediatric\*[title/abstract])

**These terms were used in Medline, Embase & Cochrane**

## Supplementary Material 2. Full Study Characteristics of Intermediate Care Units

| Authors, country of origin                                                 | Name of unit | # of HDU beds | Location | Specialties | Format (O/C) | Patients per nurse | Hemodynamic monitoring | Invasive monitoring | Respiratory support | Mechanical ventilation (weaning) | High-flow oxygen therapy | NIV/CPAP | Tracheostomy care | Single vasoactive medication | Multiple vasoactive medication | Sedatives | Intracranial pressure | Renal Replacement Therapy | Specific interventions | Residents | # of Residents | Registrars | # of Registrars | Consultants | # of Consultants |
|----------------------------------------------------------------------------|--------------|---------------|----------|-------------|--------------|--------------------|------------------------|---------------------|---------------------|----------------------------------|--------------------------|----------|-------------------|------------------------------|--------------------------------|-----------|-----------------------|---------------------------|------------------------|-----------|----------------|------------|-----------------|-------------|------------------|
| Armstrong et al. (2003) [21], Armstrong et al. (2015) [5], the Netherlands | MCU          | 9             | I        | Su, M       | C            | 2.5                | 1                      | 1                   | 1                   | x                                | x                        | 1        | x                 | 1                            | x                              | 1         | 1                     | x                         | x                      | x         | x              | x          | x               | x           | x                |
| Bannister et al. (2016) [22], UK                                           | HDU          | 2             | W        | Su          | O            | 0.67               | 1                      | x                   | 1                   | x                                | x                        | x        | x                 | x                            | x                              | x         | x                     | x                         | x                      | x         | x              | x          | x               | x           | x                |
| Batra et al. (2001) [23], UK                                               | HDU          | 6             | S        | Su          | O            | x                  | 1                      | x                   | x                   | x                                | x                        | x        | x                 | x                            | x                              | x         | x                     | x                         | x                      | x         | x              | x          | 1               | x           |                  |
| Bellomo et al. (2005) [24], Australia                                      | HDU          | 4             | A        | Su, M       | C            | 2                  | 1                      | x                   | 1                   | 0                                | x                        | 1        | x                 | 1                            | x                              | x         | x                     | 0                         | x                      | 1         | x              | 1          | x               | 1           | x                |
| Betten et al. (2016) [25], Norway                                          | HDU          | x             | x        | x           | x            | x                  | x                      | x                   | 1                   | x                                | x                        | x        | x                 | 1                            | x                              | x         | x                     | x                         | x                      | x         | x              | x          | x               | x           | x                |
| Coggins and de Cossart (1996) [26], Coggins and Infirmary (1998) [27], UK  | HDU          | 6             | x        | Su          | O            | 2                  | 1                      | 1                   | 1                   | 0                                | x                        | 1        | 1                 | 1                            | x                              | x         | x                     | 0                         | 1                      | 1         | 1              | x          | x               | x           | x                |
| Confalonieri et al. (2015) [28], Italy                                     | IMCU         | 15            | x        | M           | x            | 4                  | x                      | x                   | x                   | x                                | x                        | x        | x                 | x                            | x                              | x         | x                     | x                         | x                      | x         | x              | x          | 1               | 1           |                  |
| Crosby and Rees (1983) [29], Crosby et al. (1990) [30], UK                 | HDU          | 7             | x        | Su, M       | O            | 2                  | 1                      | x                   | x                   | x                                | x                        | x        | x                 | x                            | x                              | x         | x                     | x                         | x                      | x         | x              | x          | x               | x           | x                |
| Daud-Gallotti et al. (2012) [31], Ranzani et al. (2014) [32], Brazil       | IMCU         | 11            | S        | Su, M       | C            | 11                 | 1                      | x                   | 1                   | 0                                | 0                        | 1        | x                 | 0                            | 0                              | x         | x                     | 1                         | x                      | 1         | 2              | x          | x               | 1           | 1                |
| Davies et al. (1999) [33], UK                                              | HDU          | 4             | x        | Su          | O            | x                  | 1                      | 1                   | x                   | 0                                | x                        | 0        | x                 | 0                            | 0                              | x         | x                     | x                         | x                      | x         | x              | x          | x               | x           | x                |
| Dhond et al. (1998) [34], UK                                               | HDU          | 6             | A        | Su, M       | C            | x                  | x                      | x                   | x                   | x                                | x                        | x        | x                 | x                            | x                              | x         | x                     | x                         | x                      | x         | x              | x          | x               | x           | x                |
| Eachempati et al. (2004) [35], USA                                         | SDU          | 4             | A        | Su          | C            | 4                  | 1                      | x                   | x                   | 1                                | x                        | x        | x                 | x                            | x                              | x         | x                     | x                         | x                      | 1         | x              | x          | x               | 1           | 1                |
| Edbrooke (1996) [36], UK                                                   | HDU          | 4             | A        | Su          | C            | x                  | x                      | x                   | x                   | x                                | x                        | x        | x                 | x                            | x                              | x         | x                     | x                         | x                      | x         | x              | x          | x               | x           | x                |
| Fox et al. (1999) [37], UK                                                 | HDU          | 4             | A        | X           | x            | 2                  | x                      | x                   | x                   | x                                | x                        | x        | x                 | x                            | x                              | x         | x                     | x                         | x                      | x         | x              | x          | x               | x           | x                |
| Fujii et al. (2016) [38], Japan                                            | IMCU         | 8             | I        | Su          | C            | x                  | 1                      | 1                   | x                   | 1                                | x                        | 1        | x                 | 1                            | x                              | x         | x                     | x                         | x                      | x         | x              | x          | x               | x           | x                |
| Ghosh et al. 2004 [39], UK                                                 | HDU          | 6             | S        | Su          | O            | 1.5                | 1                      | 1                   | x                   | 0                                | x                        | 1        | x                 | 0                            | 0                              | x         | x                     | x                         | x                      | x         | x              | x          | x               | x           | x                |
| Gould et al. (2010) [40], Australia                                        | HDU          | 8             | A        | Su, M       | C            | 2                  | 1                      | 1                   | x                   | x                                | x                        | 1        | x                 | 1                            | x                              | x         | 0                     | 0                         | x                      | 1         | 1              | x          | x               | 1           | 1                |
| Harding (2009) [41], USA                                                   | IMCU         | 16            | S        | Su, M       | O            | 3                  | x                      | x                   | x                   | 1                                | x                        | x        | x                 | x                            | x                              | x         | x                     | x                         | x                      | x         | x              | x          | x               | x           | x                |
| Helm and Newman (1992) [42], UK                                            | HDU          | 4             | x        | Su          | O            | 2                  | 1                      | 1                   | x                   | 0                                | x                        | 0        | x                 | x                            | x                              | x         | x                     | x                         | x                      | x         | x              | x          | x               | x           | x                |
| Hilton et al. (1993) [43], USA                                             | SDU          | 4             | S        | Su          | O            | 2.5                | x                      | x                   | x                   | x                                | x                        | x        | x                 | x                            | x                              | x         | x                     | x                         | x                      | x         | x              | x          | x               | x           | x                |

Definition of abbreviations: MCU=Medium Care Unit; HDU=High Dependency Unit; IMCU=Intermediate Care Unit; PCU=Progressive Care Unit; SDU=Step Down Unit; I= integrated in ICU; W=part of Ward; A=Adjacent to ICU; S=Separate; Su=surgical patients; M=medical patients; O=Open; C=Closed; NIV=Non-Invasive Ventilation; CPAP=Continuous Positive Airway Pressure

| Authors, country of origin                                                                                                    | Name of unit | # of HDU beds | Location | Specialties | Format (O/C) | Patients per nurse | Hemodynamic monitoring | Invasive monitoring | Respiratory support | Mechanical ventilation (weaning) | High-flow oxygen therapy | NIV/CPAP | Tracheostomy care | Single vasoactive medication | Multiple vasoactive medication | Sedatives | Intracranial pressure | Renal Replacement Therapy | Specific interventions | Residents | # of Residents | Registrars | # of Registrars | Consultants | # of Consultants |
|-------------------------------------------------------------------------------------------------------------------------------|--------------|---------------|----------|-------------|--------------|--------------------|------------------------|---------------------|---------------------|----------------------------------|--------------------------|----------|-------------------|------------------------------|--------------------------------|-----------|-----------------------|---------------------------|------------------------|-----------|----------------|------------|-----------------|-------------|------------------|
| Hravnak et al. (2008) [44], Hravnak et al. (2011) [45], Yousef et al. (2012) [46], USA                                        | SDU          | 24            | x        | Su          | x            | 6                  | 1                      | x                   | x                   | x                                | x                        | x        | x                 | x                            | x                              | x         | x                     | x                         | x                      | x         | x              | x          | x               | x           | x                |
| Innocenti et al. (2014) [47], Italy                                                                                           | HDU          | x             | x        | ED          | C            | x                  | 1                      | 1                   | x                   | 0                                | x                        | x        | x                 | 1                            | x                              | x         | x                     | x                         | x                      | x         | x              | x          | x               | x           | x                |
| Jones et al. (1992) [48], Jones et al. (1999) [49], UK                                                                        | HDU          | 6             | S        | Su          | O            | 2                  | 1                      | x                   | x                   | 0                                | x                        | x        | x                 | x                            | x                              | x         | x                     | x                         | x                      | x         | x              | 1          | 1               | 1           | x                |
| Kalayi et al. (2001) [50], UK                                                                                                 | HDU          | 4             | x        | Su          | x            | x                  | x                      | x                   | x                   | x                                | x                        | x        | x                 | x                            | x                              | x         | x                     | x                         | x                      | x         | x              | 1          | 1               | x           | x                |
| Keegan et al. (2008) [51], USA                                                                                                | PCU          | x             | S        | Su          | O            | 4                  | 1                      | x                   | x                   | 0                                | x                        | 1        | x                 | 0                            | 0                              | x         | x                     | x                         | x                      | x         | x              | x          | x               | x           | x                |
| LeVasseur and Calder (1995) [52], Australia                                                                                   | HDU          | 4             | x        | Su          | x            | x                  | 1                      | 1                   | x                   | x                                | x                        | x        | x                 | x                            | x                              | x         | x                     | x                         | x                      | x         | x              | x          | x               | x           | x                |
| Lucena et al. (2012) [8], Lucena et al. (2013) [53], Alegre et al. (2015) [54], Martinez-Urbistondo et al. (2015) [55], Spain | IMCU         | 9             | A        | Su, M       | C            | 3                  | 1                      | 1                   | x                   | x                                | x                        | 1        | x                 | x                            | x                              | x         | x                     | x                         | x                      | 1         | 1              | x          | x               | 1           | 1                |
| Nehra et al. (1994) [56], UK                                                                                                  | HDU          | 8             | I        | Su          | x            | 2                  | x                      | x                   | x                   | x                                | x                        | x        | x                 | x                            | x                              | x         | x                     | x                         | x                      | x         | x              | x          | x               | x           | x                |
| Pilling et al. (2004) [57], UK                                                                                                | HDU          | x             | x        | Su          | O            | x                  | 1                      | 1                   | x                   | 0                                | x                        | 1        | x                 | 1                            | 0                              | x         | x                     | 0                         | x                      | x         | x              | x          | x               | x           | x                |
| Pirret (2002) [58], New Zealand                                                                                               | HDU          | 3             | I        | Su          | O            | 3                  | 1                      | 1                   | 1                   | x                                | 1                        | 1        | x                 | 1                            | x                              | x         | x                     | x                         | x                      | x         | x              | x          | x               | x           | x                |
| Potena et al. (2004) [59], Italy                                                                                              | IMCU         | x             | x        | M           | x            | x                  | 1                      | 0                   | x                   | 1                                | x                        | 1        | 1                 | x                            | x                              | x         | x                     | x                         | x                      | x         | x              | x          | x               | x           | x                |
| Richards et al. (2012) [60], USA                                                                                              | IMCU         | x             | S        | Su          | O            | x                  | x                      | x                   | x                   | x                                | x                        | x        | x                 | x                            | x                              | x         | x                     | x                         | x                      | x         | x              | x          | x               | x           | x                |
| Robertson et al. (2011) [19], UK                                                                                              | HDU          | 10            | S        | Su, M       | O            | x                  | 1                      | x                   | x                   | x                                | x                        | 1        | x                 | x                            | x                              | x         | x                     | 1                         | x                      | x         | x              | x          | x               | x           | x                |
| Robertson et al. (2011) [19] UK                                                                                               | x            | 10            | S        | Su, M       | C            | x                  | 1                      | x                   | x                   | x                                | x                        | 1        | x                 | x                            | x                              | x         | x                     | 1                         | x                      | x         | x              | x          | x               | x           | x                |
| Shum et al. (2013) [61], Canada                                                                                               | SDU          | x             | W        | Su, M       | O            | 2                  | 1                      | 1                   | x                   | 0                                | x                        | 1        | x                 | 1                            | x                              | x         | 0                     | 0                         | x                      | x         | x              | x          | x               | x           | x                |
| Solberg et al. (2008) [62], Solberg et al. (2014) [63], the Netherlands                                                       | IMCU         | 6             | A        | Su, M       | C            | 3                  | x                      | x                   | x                   | x                                | x                        | x        | x                 | x                            | x                              | x         | x                     | x                         | x                      | x         | x              | x          | x               | x           | x                |
| Torres et al. (2006) [64], Spain                                                                                              | IMCU         | 20            | A        | Su, M       | x            | x                  | 1                      | 1                   | x                   | 1                                | x                        | 1        | x                 | 1                            | x                              | x         | x                     | 1                         | x                      | x         | x              | x          | x               | x           | x                |
| Yoo et al. (2015) [20], USA                                                                                                   | PCU          | 10            | A        | M           | C            | 3.5                | 1                      | 0                   | x                   | 1                                | x                        | x        | x                 | x                            | x                              | x         | 0                     | x                         | x                      | 1         | x              | x          | x               | 1           | x                |
| Yoo et al. (2015) [20], USA                                                                                                   | x            | 15            | S        | M           | O            | 3.5                | 1                      | 0                   | x                   | 1                                | x                        | x        | x                 | x                            | x                              | x         | 0                     | x                         | x                      | x         | x              | x          | x               | x           | x                |

<sup>a</sup>This Intermediate Care Unit was described in the same article as the one above, after changing its management format.

<sup>b</sup>This Intermediate Care Unit was described in the same article as the one above, after changing its location and management format.

Definition of abbreviations: MCU=Medium Care Unit; HDU=High Dependency Unit; IMCU=Intermediate Care Unit; PCU=Progressive Care Unit; SDU=Step Down Unit; I= integrated in ICU; W=part of Ward; A=Adjacent to ICU; S=Separate; Su=surgical patients; M=medical patients; O=Open; C=Closed; NIV=Non-Invasive Ventilation; CPAP=Continuous Positive Airway Pressure
